# Supplementary material for: Integrated Microfluidic Lectin Barcode Platform for High-Performance Focused Glycomic Profiling
Source: PubMed Central journal article supplement (PMC4735825; doi:10.1038/srep20297), 2016-02-02
Supplement: srep20297-s1.pdf [file srep20297-s1.pdf]

# **Integrated Microfluidic Lectin Barcode Platform for High-Performance Focused Glycomic Profiling**

Yuqin Shang<sup>1</sup>, Yun Zeng<sup>2</sup>, and Yong Zeng<sup>1,3\*</sup>

1. Department of Chemistry, University of Kansas, Lawrence, KS 66045;

2. College of Water Resource and Hydropower, Sichuan Agricultural University, Ya'an, Sichuan 625014, P.R. China

3. University of Kansas Cancer Center, Kansas City, KS 66160

\* Corresponding author.

Tel: (785) 864-8105; Fax: (785) 864-5396; E-mail: [yongz@ku.edu](mailto:yongz@ku.edu)

Table S1. List of Lectins used in this work and their glycan binding specificities.

|           | <b>Lectins</b> | <b>Origin</b>                  | <b>Binding specificity</b>                                                                       |
|-----------|----------------|--------------------------------|--------------------------------------------------------------------------------------------------|
| <b>1</b>  | PNA            | <i>Arachis hypogaea</i>        | Gal $\beta$ 1-3 GalNAc $\alpha$ -Thr/Ser (T antigen)                                             |
| <b>2</b>  | LCA            | <i>Lens culinaris</i>          | Fuc $\alpha$ 1-6GlcNAc and $\alpha$ -Man, $\alpha$ -Glc                                          |
| <b>3</b>  | SBA            | <i>Glycine max</i>             | Terminal GalNAc (especially GalNAc $\alpha$ 1-3Gal)                                              |
| <b>4</b>  | AAL            | <i>Aleuria aurantia</i>        | Terminal $\alpha$ Fuc and $\pm$ Sia-Le <sup>x</sup>                                              |
| <b>5</b>  | MAL II         | <i>Maackia amurensis II</i>    | Sia $\alpha$ 2-3Gal                                                                              |
| <b>6</b>  | SNA            | <i>Sambucus nigra</i>          | Sia $\alpha$ 2-6Gal/GalNAc                                                                       |
| <b>7</b>  | PHA-L          | <i>Phaseolus vulgaris</i>      | Tri- and tetra-antennary complex oligosaccharides                                                |
| <b>8</b>  | ECA            | <i>Erythrina cristagalli</i>   | Lac/LacNAc                                                                                       |
| <b>9</b>  | RCA120         | <i>Ricinus communis</i>        | Galactose, Lac/LacNAc                                                                            |
| <b>10</b> | DSL            | <i>Datura stramonium</i>       | (GlcNAc) <sub>n</sub> , polyLacNAc and LacNAc (NA3, NA4)                                         |
| <b>11</b> | GSL-II         | <i>Griffonia simplicifolia</i> | Agalactosylated N-glycan                                                                         |
| <b>12</b> | ConA           | <i>Canavalia ensiformis</i>    | $\alpha$ -Man (inhibited by presence of bisecting GlcNAc), $\alpha$ -Glc, complex-type N-glycans |
| <b>13</b> | GNA            | <i>Galanthus nivalis</i>       | non-substituted $\alpha$ 1-3 and $\alpha$ 1-6 Man                                                |
| <b>14</b> | UEA-I          | <i>Ulex europaeus</i>          | Fuc $\alpha$ 1-2LacNAc                                                                           |
| <b>15</b> | VVL            | <i>Vicia villosa</i>           | $\alpha$ -, $\beta$ -linked terminal GalNAc and GalNAc $\alpha$ -Thr/Ser (Tn)                    |
| <b>16</b> | WGA            | <i>Triticum unlgaris</i>       | GlcNAc $\beta$ 1-4GlcNAc $\beta$ 1-4GlcNAc, $\beta$ -GlcNAc and multivalent Sia                  |

Table S2. Datasheet of three commercial CA125 protein samples used in this work

| Vendor                  | MeridianLifeScience                                                    | MeridianLifeScience                                                                      | Fitzgerald Industries                                                  |
|-------------------------|------------------------------------------------------------------------|------------------------------------------------------------------------------------------|------------------------------------------------------------------------|
| Catalog No.             | A86928H                                                                | A97180H                                                                                  | 30-AC21                                                                |
| Source                  | Human ovarian adenocarcinoma tissue                                    | Ovarian carcinoma cell line                                                              | Ascitic fluids from ovarian cancer patients                            |
| Purity/<br>Purification | >50% pure by SDS-PAGE                                                  | Known Contaminants:<br>CA19-9= 124<br>Units/mL(<0.1%)<br>CA15-3= 2.15<br>Units/mL(<0.1%) | >95% pure                                                              |
| Concentration           | 650,000 Units/mL                                                       | 83,840 Units/mL                                                                          | 750,000 Units/mL                                                       |
| Format &<br>Buffer      | Liquid in PBS (pH7.4) with<br>3% sucrose and 0.05%<br>NaN <sub>3</sub> | Liquid in PBS (pH7.4 ± 0.2)<br>with 0.1% NaN <sub>3</sub>                                | Liquid in PBS (pH7.2) with<br>3% sucrose and 0.05%<br>NaN <sub>3</sub> |

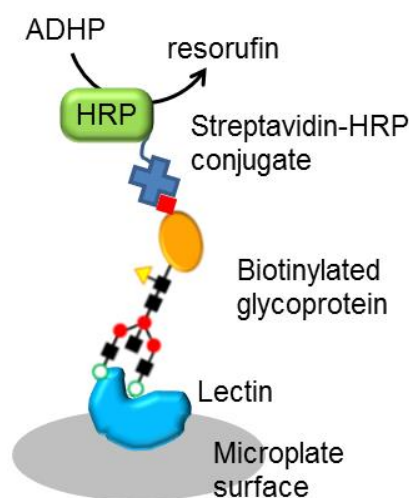

**Figure S1.** Scheme of the microplate-based lectin assay using horseradish peroxidase-conjugated streptavidin and the QuantaRed HRP substrate (ADHP) for absorbance or enhanced chemifluorescent detection.

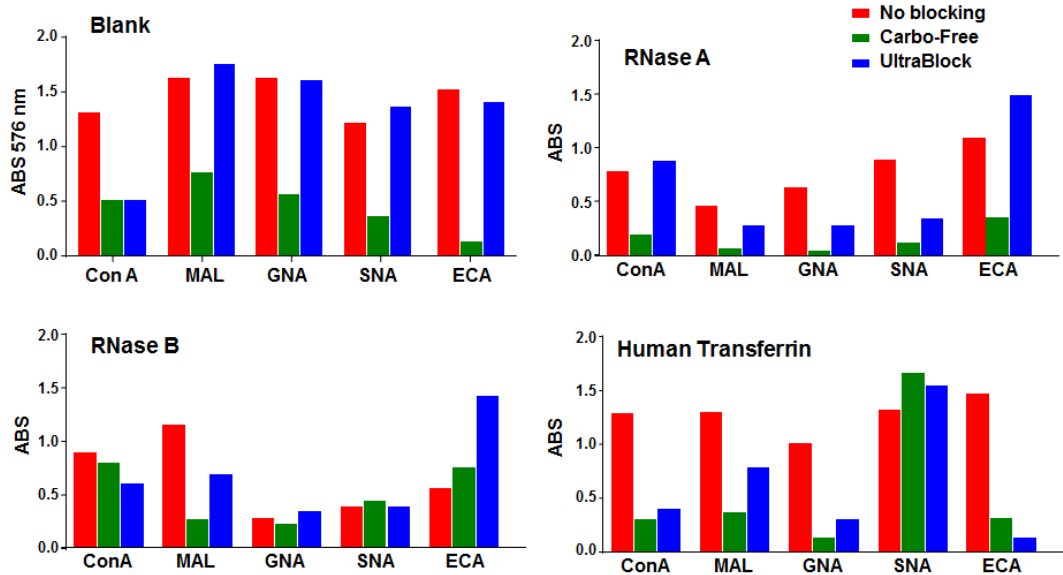

**Figure S2.** Effects of different blocking solutions, Carbo-Free (Vector) and UltraBlock (AbD Serotec), on the background and binding of two biotinylated glycoproteins and one control protein (1  $\mu$ M) using six lectins deposited in a 384-well microtiter plate.

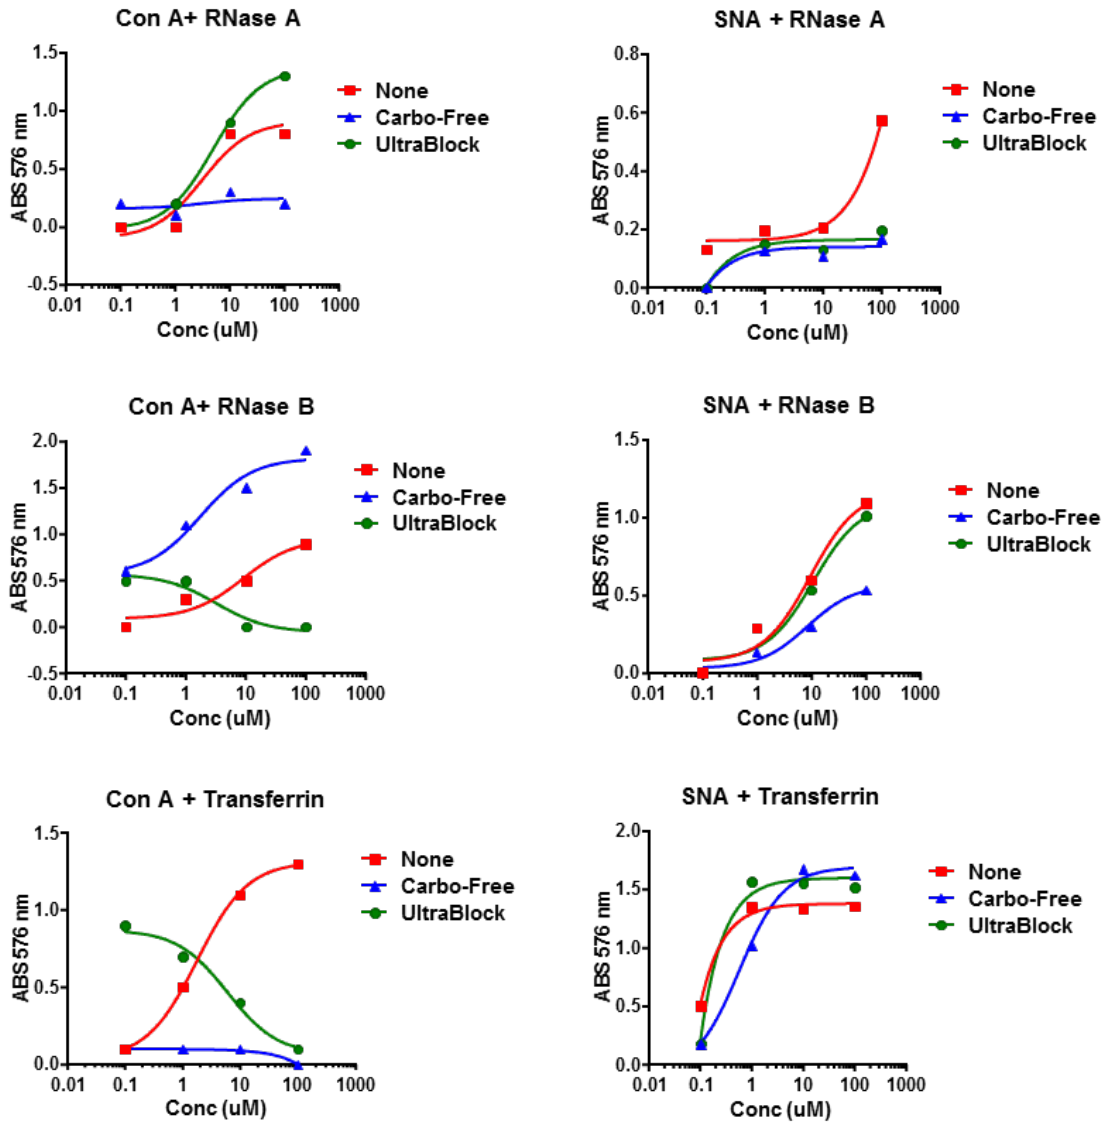

**Figure S3.** Concentration titration of the standard protein/glycoproteins using Con A and SNA confirms the blocking effectiveness of the Carbo-Free solution and suggests no inhibition on lectin-glycan binding, in contrast to the UltraBlock solution.

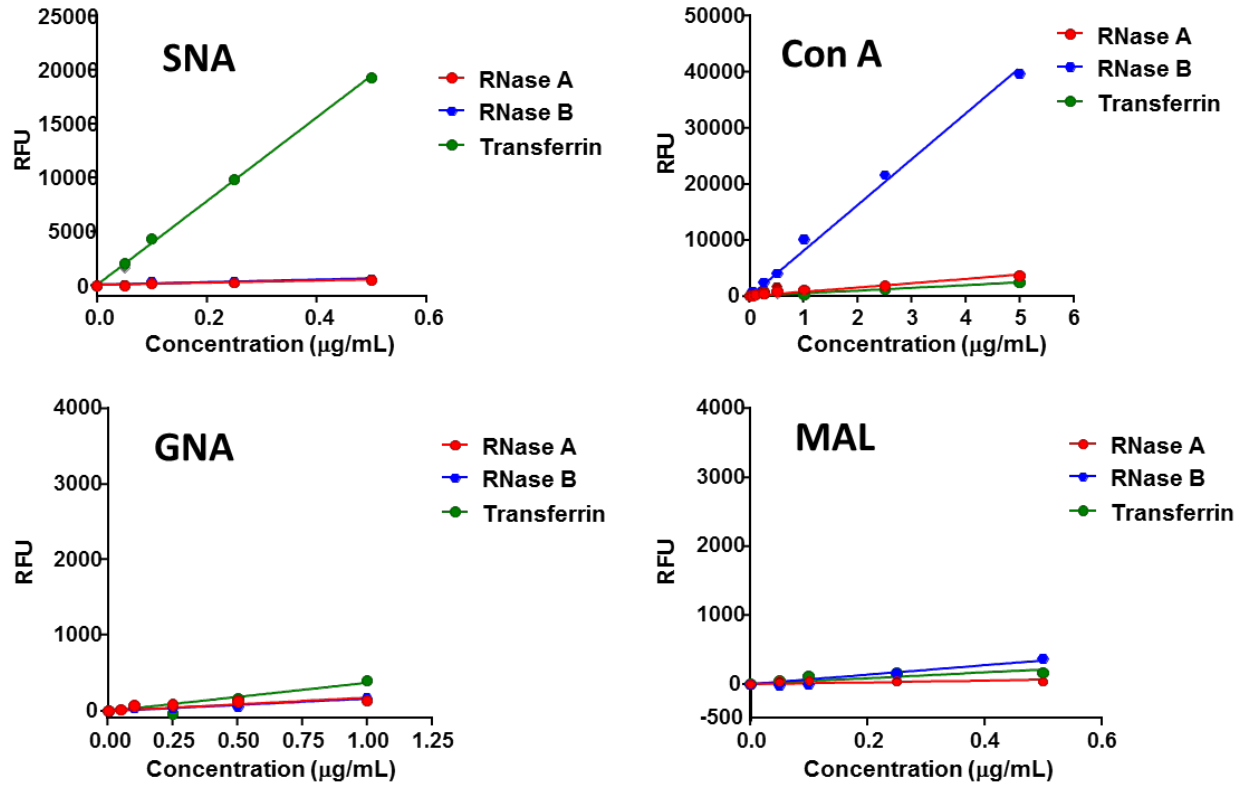

**Figure S4.** Quantitative detection of three standard protein and glycoproteins using various lectins. Assay conditions: buffer, TBST (20 mM Tris (pH 7.6), 150 mM NaCl, and 0.05% Tween 20), blocking buffer, Carbo-Free; HRP-STV, 1.5 mg/ml; overnight binding; QuantaRed fluorescence detection.

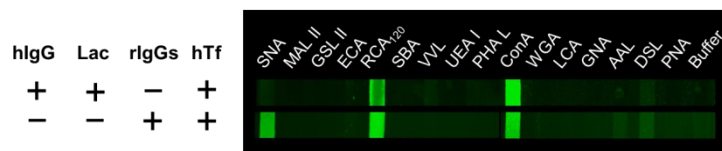

**Figure S5.** Comparison of blocking performance of a mixture of hIgG and lactose (top) and rIgG (bottom) for glycan profiling of hTf. The hIgG and lactose mixture blocker inhibits specific glycan binding for SNA and AAL.
